# Supplementary material for: Long-term impact of maternal interpersonal violence-related posttraumatic stress disorder on externalizing symptoms and psycho-physiological stress regulation in school-aged children
Source: Research Square preprint supplement (doi:10.21203/rs.3.rs-7761735/v1), 2025-11-11
Supplement: Supplementary file 1 [file 6e4ad0667ba94e86abda3ff4.docx]

**Supplementary files**

**Table S.1**

*Wilcoxon Signed-Rank Tests of Cortisol Sampling Measures During the Trier Social Stress Test for Children Laboratory Session for The Total Sample*

|  |  | Wlicoxon *W* | *p* |
| --- | --- | --- | --- |
| Baseline 0 vs | Pretest 1 | 112.00 | .258 |
|  | Pretest 2 | 110.00 | .867 |
|  | T0 | 93.50 | .291 |
|  | T1 | 66.00 | .003** |
|  | T2 | 94.00 | .008** |
|  | T3 | 78.00 | .024* |
| Pretest 1 vs | Pretest 2 | 25.50 | .173 |
|  | T0 | 21.00 | .005** |
|  | T1 | 15.00 | <.001 *** |
|  | T2 | 17.00 | <.001 *** |
|  | T3 | 22.00 | <.001 *** |
| Pretest 2 vs | T0 | 29.00 | .008** |
|  | T1 | 36.50 | <.001 *** |
|  | T2 | 46.00 | <.001*** |
|  | T3 | 68.00 | .007** |
| T0 vs | T1 | 50.00 | .001** |
|  | T2 | 78.00 | .014** |
|  | T3 | 95.00 | .119 |
| T1 vs | T2 | 236.50 | .452 |
|  | T3 | 295.00 | <.001 *** |
| T2 vs | T3 | 307.00 | <.001 *** |

Note. *Abbreviations: TSST-C, Trier Social Stress Test for Children; Baseline 0, cortisol sample 10 minutes upon arrival (n=40); Pretest 1, cortisol sample 20 minutes afterwards (n=41); Pretest 2, cortisol sample 15 minutes afterwards (n=43); T0, cortisol sample immediately after the Trier Social Stress Test for Children (n=42); T1 (n=44), T2 (n=42), T3 (n=43), cortisol samples taken every 10 minutes after the stressor*

*p <.05. **p <.01. ***p <.001.

**Table S.2**

*Wilcoxon Signed-Rank Tests of Cortisol Sampling Measures During the Trier Social Stress Test for Children Laboratory Session for Children of IPV-PTSD Mothers*

|  |  | Wlicoxon *W* | *p* |
| --- | --- | --- | --- |
| Baseline 0 vs | Pretest 1 | 31.00 | .080 |
|  | Pretest 2 | 30.00 | .407 |
|  | T0 | 32.00 | .610 |
|  | T1 | 17.00 | .009** |
|  | T2 | 24.00 | .024* |
|  | T3 | 17.00 | .028* |
| Pretest 1 vs | Pretest 2 | 5.00 | .295 |
|  | T0 | 1.00 | .013* |
|  | T1 | 0.00 | .001** |
|  | T2 | 0.00 | .003** |
|  | T3 | 0.00 | .003** |
| Pretest 2 vs | T0 | 6.00 | .032* |
|  | T1 | 5.00 | .002** |
|  | T2 | 3.00 | .003** |
|  | T3 | 8.00 | .006** |
| T0 vs | T1 | 7.00 | .003** |
|  | T2 | 12.00 | .021* |
|  | T3 | 22.00 | .108 |
| T1 vs | T2 | 69.00 | .629 |
|  | T3 | 93.00 | .012* |
| T2 vs | T3 | 78.00 | .025* |

*Note. Abbreviations: IPV-PTSD, interpersonal violence post-traumatic stress disorders; TSST-C, Trier Social Stress Test for Children; Baseline 0, cortisol sample 10 minutes upon arrival; Pretest 1, cortisol sample 20 minutes afterwards; Pretest 2, cortisol sample 15 minutes afterwards; T0, cortisol sample immediately after the TSST-C; T1, T2, T3, cortisol samples taken every 10 minutes after the stressor*

*p <.05. **p <.01. ***p <.001.

**Table S.3**

*Wilcoxon Signed-Rank Tests of Cortisol Sampling Measures During the Trier Social Stress Test for Children Laboratory Session for Children of HC Mothers*

|  |  | Wilcoxon *W* | *p* | |
| --- | --- | --- | --- | --- |
| Baseline 0 vs | Pretest 1 | 30.00 | .838 |
|  | Pretest 2 | 30.00 | .824 |
|  | T0 | 18.50 | .386 |
|  | T1 | 15.00 | .120 |
|  | T2 | 20.00 | .147 |
|  | T3 | 22.00 | .351 |
| Pretest 1 vs | Pretest 2 | 8.00 | .353 |
|  | T0 | 8.00 | .097 |
|  | T1 | 6.00 | .018* |
|  | T2 | 8.00 | .017* |
|  | T3 | 13.00 | .083 |
| Pretest 2 vs | T0 | 11.00 | .193 |
|  | T1 | 15.00 | .065 |
|  | T2 | 19.00 | .069 |
|  | T3 | 27.00 | .367 |
| T0 vs | T1 | 20.00 | .266 |
|  | T2 | 24.50 | .272 |
|  | T3 | 29.00 | .756 |
| T1 vs | T2 | 49.00 | .456 |
|  | T3 | 63.00 | .009** |
| T2 vs | T3 | 69.00 | .021* |

Note. *Abbreviations: HC, healthy control; TSST-C, Trier Social Stress Test for Children; Baseline 0, cortisol sample 10 minutes upon arrival; Pretest 1, cortisol sample 20 minutes afterwards; Pretest 2, cortisol sample 15 minutes afterwards; T0, cortisol sample immediately after the TSST-C; T1, T2, T3, cortisol samples taken every 10 minutes after the stressor*

*p <.05. **p <.01. ***p <.001.

**Table S.4**

*Group Comparisons of Cortisol Levels During the Trier Social Stress Test for Children Between Children of IPV-PTSD and HC Mothers*

|  | |  | |  | |
| --- | --- | --- | --- | --- | --- |
|  | Mann-Whitney U | | p | |
| Baseline 0 | 161.50 | | .650 | |
| Pretest 1 | 139.50 | | .081 | |
| Pretest 2 | 169.00 | | .179 | |
| T0 | 171.50 | | .344 | |
| T1 | 197.00 | | .482 | |
| T2 | 172.00 | | .347 | |
| T3 | 189.00 | | .480 | |

Note. IPV-PTSD, interpersonal violence post-traumatic stress disorders; HC, healthy control; *Baseline 0, cortisol sample 10 minutes upon arrival; Pretest 1, cortisol sample 20 minutes afterwards; Pretest 2, cortisol sample 15 minutes afterwards; T0, cortisol sample immediately after the TSST-C; T1, T2, T3, cortisol samples taken every 10 minutes after the stressor*

*p <.05. **p <.01. ***p <.001

**Table S.5**

*Wilcoxon Signed-Rank Tests of Self-Reported Subjective Stress Levels During the Trier Social Stress Test for Children Laboratory Session in the Total Sample*

|  |  | Wilcoxon *W* | *p* |
| --- | --- | --- | --- |
| Baseline 0 vs | Electrodes | 223.00 | .224 |
| Electrodes vs | Pretest 1 | 120.50 | .254 |
| Pretest 1vs | Pretest 2 | 56.00 | .006** |
| Pretest 2 vs | T’ | 180.00 | .385 |
| T’ vs | T0 | 102.00 | .645 |
| T0 vs | T1 | 272.00 | <.001 *** |
| T1 vs | T2 | 87.50 | .604 |
| T2 vs | T3 | 34.00 | .533 |

*Note. Abbreviations: IPV-PTSD, interpersonal violence post-traumatic stress disorders; HC, healthy control; VAS, Visual Analogue Scale; Baseline 0, measure 10 minutes upon arrival (n=48), ); Electrodes, measure after electrode placement (n=48); Pretest 1, measure 5 minutes afterwards (n=48); Pretest 2, measure 15 minutes afterwards (n=48); T’, measure during the TSST-C (n=46); T0, measure immediately after the TSST-C (n=48); T1 (n=48), T2 (n=45), T3 (n=44), measures taken every 10 minutes after the stressor*

**p <.05. **p <.01. ***p <.001.*

**Table S.6**

*Wilcoxon Signed-Rank Tests of Self-Reported Subjective Stress Levels During The Trier Social Stress Test for Children in Children Laboratory Session of IPV-PTSD Mothers*

|  |  | Wilcoxon *W* | *p* |
| --- | --- | --- | --- |
| Baseline 0 vs | Electrodes | 63.500 | .209 |
| Electrodes vs | Pretest 1 | 18.00 | .078 |
| Pretest 1 vs | Pretest 2 | 12.00 | .033* |
| Pretest 2 vs | T’ | 26.00 | .538 |
| T’ vs | T0 | 30.00 | .821 |
| T0 vs | T1 | 109.00 | .005** |
| T1 vs | T2 | 17.50 | 1.000 |
| T2 vs | T3 | 14.00 | .518 |

*Note. Abbreviations: IPV-PTSD, interpersonal violence post-traumatic stress disorders; VAS, Visual Analogue Scale; Baseline 0, measure 10 minutes upon arrival (n=25), ); Electrodes, measure after electrode placement (n=25); Pretest 1, measure 5 minutes afterwards (n=25); Pretest 2, measure 15 minutes afterwards (n=25); T’, measure during the TSST-C (n=24); T0, measure immediately after the TSST-C (n=25); T1 (n=25), T2 (n=23), T3 (n=22), measures taken every 10 minutes after the stressor*

**p <.05. **p <.01. ***p <.001.*

**Table S.7**

*Wilcoxon Signed-Rank Tests of Self-Reported Subjective Stress Levels During Trier Social Stress Test for Children Laboratory Session in Children of HC Mothers*

|  |  | Wilcoxon *W* | *p* |
| --- | --- | --- | --- |
| Baseline 0 vs | Electrodes | 50.00 | .134 |
| Electrodes vs | Pretest 1 | 18.00 | .184 |
| Pretest 1 vs | Pretest 2 | 8.00 | .044* |
| Pretest 2 vs | T’ | 46.00 | .260 |
| T’ vs | T0 | 25.50 | .760 |
| T0 vs | T1 | 32.00 | .056 |
| T1 vs | T2 | 21.50 | .660 |
| T2 vs | T3 | 5.00 | 1.000 |

Note. *Abbreviations: HC, healthy control; VAS, Visual Analogue Scale; Baseline 0, measure 10 minutes upon arrival (n=20); Electrodes, measure after electrode placement (n=20); Pretest 1, measure 5 minutes afterwards (n=20); Pretest 2, measure 15 minutes afterwards (n=20); T’, measure during the TSST-C (n=19); T0, measure immediately after the TSST-C (n=20); T1 (n=20), T2 (n=19), T3 (n=19), measures taken every 10 minutes after the stressor*

*p <.05. **p <.01. ***p <.001.

**Table S.8**

*Between-Group Comparisons of Subjective Stress Levels Throughout the Trier Social Stress Test for Children Laboratory Session in IPV-PTSD and HC Children*

|  | | |  |  | |
| --- | --- | --- | --- | --- | --- |
|  | Mann-Whitney *U* | *p* | | |
| VAS Baseline 0 | 200.50 | .222 | | |
| VAS Electrodes | 215.50 | .377 | | |
| VAS Pretest 1 | 203.00 | .258 | | |
| VAS Pretest 2 | 201.50 | .259 | | |
| VAS T’ | 210.00 | .656 | | |
| VAS T0 | 242.00 | .858 | | |
| VAS T1 | 217.00 | .365 | | |
| VAS T2 | 205.00 | .688 | | |
| VAS T3 | 167.50 | .154 | | |

*Note. Abbreviations: IPV-PTSD, interpersonal violence post-traumatic stress disorders; HC: healthy control; VAS, Visual Analogue Scale; Baseline 0, measure 10 minutes upon arrival (nIPV-PTSD=25; nHC = 20), Electrodes, measure after electrode placement (nIPV-PTSD=25; nHC = 20); Pretest 1, measure 5 minutes afterwards (nIPV-PTSD=25; nHC = 20); Pretest 2, measure 15 minutes afterwards (nIPV-PTSD=25; nHC = 20); T’, measure during the TSST-C (nIPV-PTSD=24; nHC = 19); T0, measure immediately after the TSST-C (nIPV-PTSD=25; nHC = 20); T1(nIPV-PTSD=25; nHC = 20), T2 (nIPV-PTSD=23; nHC = 19), T3 (nIPV-PTSD=22; nHC = 19), measures taken every 10 minutes after the stressor*

*p <.05. **p <.01. ***p <.001.
